# Supplementary material
Source: Springer Nature journal article supplement (https://www.springermedizin.de/resource/supplementary/13014_2013_1224_MOESM3_ESM.pdf/9635184)

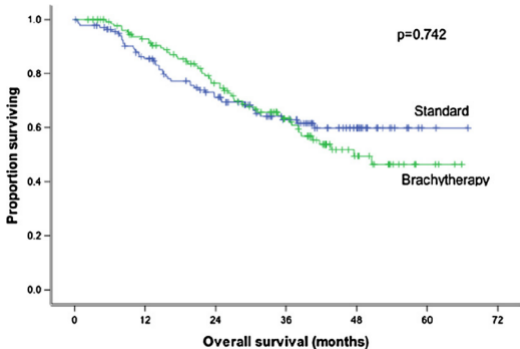

|               |     |     |    |    |    |   |   |
|---------------|-----|-----|----|----|----|---|---|
| Standard      | 139 | 108 | 80 | 50 | 22 | 2 | 0 |
| Brachytherapy | 134 | 114 | 83 | 51 | 20 | 4 | 0 |

Supplement: MOESM3 [file 9635184]
